# Supplementary material for: Barriers to Adherence to Healthy Diet and Recommended Physical Activity Perceived by the Polish Population
Source: MDPI journal article supplement (doi:10.3390/jcm13010022), 2023-12-19
Supplement: s1 [file s1]

## QUESTIONNAIRE

### Sociodemographic data

1. Gender:
  - a) Woman
  - b) Man
2. Year of birth .....
3. In which voivodeship do you live?:
  - a) Lower Silesia
  - b) Kuyavia-Pomerania
  - c) Lublin Voivodeship
  - d) Lubusz
  - e) Łódź Voivodeship
  - f) Lesser Poland
  - g) Masovia
  - h) Opole Voivodeship
  - i) Subcarpathia
  - j) Podlaskie Voivodeship
  - k) Pomerania
  - l) Silesia
  - m) Świętokrzyskie Voivodeship
  - n) Warmia-Masuria
  - o) Greater Poland
  - p) West Pomerania
4. What is your place of residence:
  - a) Countryside
  - b) Town  $\leq 200\ 000$
  - c) Town  $200\ 000 - 500\ 000$
  - d) Town  $\geq 500\ 000$
5. What is your education?:
  - a) Primary or middle school
  - b) Basic vocational
  - c) Secondary or post-secondary education
  - d) Higher education (Bachelor's degree and above)
6. What is your employment status
  - a) Employed (full-time or self-employed)
  - b) Student
  - c) Unemployed
  - d) Retired
  - e) Disability pensioner
  - f) Runs a household
7. How do you assess your financial situation:

- a) Very bad
- b) Bad
- c) Average
- d) Good
- e) Very good

8. How do you assess your health condition:

- a) Very bad
- b) Bad
- c) Average
- d) Good
- e) Very good

9. What type of work do you perform:

- a) White-collar
- b) Blue-collar
- c) Mixed

## Barriers

Healthy diet means: consumption of regular, diverse meals, rich in complex carbohydrates, legumes, vegetables, and fruit; while minimizing or avoiding excessive amounts of animal fat, salt, sweets, highly processed foods, and alcohol.

To what extent do the following factors limit your ability to follow a healthy diet/eating healthy every day:

| LP. |                                                                                                                      | Definitely limiting | Limiting to a small extent | Rather not limiting | Definitely not limiting |
|-----|----------------------------------------------------------------------------------------------------------------------|---------------------|----------------------------|---------------------|-------------------------|
| 1   | Lack of time and competing priorities (work, family, hobbies)                                                        |                     |                            |                     |                         |
| 2   | Costs of healthy food                                                                                                |                     |                            |                     |                         |
| 3   | Adjusting habits to a healthier diet                                                                                 |                     |                            |                     |                         |
| 4   | Lack or limited access to good-quality, organically grown and bred products                                          |                     |                            |                     |                         |
| 5   | Difficulties in avoiding unhealthy foods in local community settings or at gatherings (business, family)             |                     |                            |                     |                         |
| 6   | Taste of healthy food                                                                                                |                     |                            |                     |                         |
| 7   | Lack of knowledge on current healthy eating recommendations                                                          |                     |                            |                     |                         |
| 8   | Lack of belief in the efficacy of healthy diet for preventing lifestyle-related diseases                             |                     |                            |                     |                         |
| 9   | Unhealthy or erroneous family dietary patterns                                                                       |                     |                            |                     |                         |
| 10  | Lack of motivation to enact changes                                                                                  |                     |                            |                     |                         |
| 11  | Availability of high-calorie and fast-food products                                                                  |                     |                            |                     |                         |
| 12  | Lack of support from family and friends                                                                              |                     |                            |                     |                         |
| 13  | Lack of knowledge and skills regarding the necessary steps to implement healthy lifestyle principles                 |                     |                            |                     |                         |
| 14  | Lack of support/solutions/proposals from the health care system (primary care physician, dietitian, physiotherapist) |                     |                            |                     |                         |

Regular physical activity means activity performed at least three times a week, amounting to 150-300 minutes per week.

To what extent do the following factors limit your ability to engage in regular physical activity on a daily basis:

| LP |                                                                           | Definitely limiting | Limiting to a small extent | Rather not limiting | Definitely not limiting |
|----|---------------------------------------------------------------------------|---------------------|----------------------------|---------------------|-------------------------|
| 1  | Lack of time and competing priorities (work, family, hobbies)             |                     |                            |                     |                         |
| 2  | Competition with activities promoting a sedentary lifestyle (watching TV) |                     |                            |                     |                         |

|    |                                                                                                                                                   |  |  |  |  |
|----|---------------------------------------------------------------------------------------------------------------------------------------------------|--|--|--|--|
| 3  | Social norms and stigma of “not feeling welcome” (e.g. in a fitness club)                                                                         |  |  |  |  |
| 4  | Barriers in the built-up environment and geographical isolation ( <i>there is no place to exercise, I have no access to fitness clubs, pool</i> ) |  |  |  |  |
| 5  | Fear of injury                                                                                                                                    |  |  |  |  |
| 6  | Weather conditions                                                                                                                                |  |  |  |  |
| 7  | My level of physical activity is currently sufficient                                                                                             |  |  |  |  |
| 8  | Lack of willingness to exercise (in the short/temporary term)                                                                                     |  |  |  |  |
| 9  | Concern due to physical condition (e.g. disability, chronic illness) – <i>my health is not good enough</i>                                        |  |  |  |  |
| 10 | Feelings of constant fatigue and lack of energy                                                                                                   |  |  |  |  |
| 11 | Lack of knowledge on current physical activity recommendations                                                                                    |  |  |  |  |
| 12 | Lack of belief in the effectiveness of physical activity for preventing lifestyle-related diseases                                                |  |  |  |  |
| 13 | Lack of motivation to exercise (in the long term)                                                                                                 |  |  |  |  |
| 14 | Lack of skills – <i>I am not physically fit enough</i>                                                                                            |  |  |  |  |
| 15 | Lack of support from the health care system ( <i>primary care physicians, dietitians, physiotherapists</i> )                                      |  |  |  |  |
| 16 | Lack of support from family and friends – <i>I have no one I can exercise with</i>                                                                |  |  |  |  |

**Table S1.** Barriers limiting healthy diet depending on sex (% , n=2000)

| Barrier                                                                                                           | Sex   | Definitely limiting | Slightly limiting | Not really limiting | Definitely not limiting | Chi2   | p       |
|-------------------------------------------------------------------------------------------------------------------|-------|---------------------|-------------------|---------------------|-------------------------|--------|---------|
| Costs of healthy food                                                                                             | women | 48.2                | 33.4              | 14.6                | 3.7                     | 25.893 | p<0.001 |
|                                                                                                                   | men   | 37.9                | 36.8              | 21.0                | 4.3                     |        |         |
| Lack of support/solutions/proposals from the health care system (primary care doctor, dietitian, physiotherapist) | women | 23.4                | 35.0              | 29.9                | 11.7                    | 22.141 | p<0.001 |
|                                                                                                                   | men   | 15.4                | 36.1              | 33.7                | 14.8                    |        |         |
| Lack of access or difficulties in access to good quality products from organic farming and breeding               | women | 21.1                | 35.7              | 32.5                | 10.7                    | 14.919 | p<0.01  |
|                                                                                                                   | men   | 15.0                | 41.7              | 32.1                | 11.2                    |        |         |
| Lack of support from family, friends and colleagues                                                               | women | 18.1                | 32.8              | 32.5                | 16.6                    | 19.937 | p<0.001 |
|                                                                                                                   | men   | 11.3                | 32.9              | 37.6                | 18.2                    |        |         |
| Lack of knowledge about current recommendations on healthy diet                                                   | women | 14.0                | 34.6              | 33.0                | 18.3                    | 13.235 | p<0.01  |
|                                                                                                                   | men   | 10.6                | 37.4              | 37.6                | 14.5                    |        |         |

**Table S2.** Barriers limiting healthy diet depending on age (% , n=2000)

| Barrier                                                       | Age (years) | Definitely limiting | Slightly limiting | Not really limiting | Definitely not limiting | Chi2   | p       |
|---------------------------------------------------------------|-------------|---------------------|-------------------|---------------------|-------------------------|--------|---------|
| Lack of time and competing priorities (work, family, hobbies) | 18 - 29     | 28.0                | 43.5              | 20.5                | 8.1                     | 73.868 | p<0.001 |
|                                                               | 30 - 39     | 33.6                | 39.3              | 19.8                | 7.3                     |        |         |
|                                                               | 40 - 59     | 26.6                | 38.7              | 24.8                | 10.0                    |        |         |
|                                                               | ≥60         | 17.7                | 36.2              | 27.4                | 18.7                    |        |         |
| Easy access to high-calorie and fast food products            | 18 - 29     | 34.2                | 34.8              | 21.7                | 9.3                     | 53.892 | p<0.001 |
|                                                               | 30 - 39     | 28.4                | 31.8              | 28.6                | 11.2                    |        |         |
|                                                               | 40 - 59     | 17.7                | 36.7              | 32.8                | 12.8                    |        |         |
|                                                               | ≥60         | 19.3                | 33.5              | 31.5                | 15.7                    |        |         |

**Table S3.** Barriers limiting healthy diet depending on education level (% , n=2000)

| Barrier                                                                                                   | Education level                      | Definitely limiting | Slightly limiting | Not really limiting | Definitely not limiting | Chi2   | p       |
|-----------------------------------------------------------------------------------------------------------|--------------------------------------|---------------------|-------------------|---------------------|-------------------------|--------|---------|
| Lack of knowledge and skills on what steps should be taken to apply the principles of a healthy lifestyle | Primary or secondary school          | 24.6                | 32.8              | 31.1                | 11.5                    | 26.290 | p<0.01  |
|                                                                                                           | Basic vocational                     | 20.5                | 34.9              | 34.5                | 10.1                    |        |         |
|                                                                                                           | Secondary or post-secondary          | 15.7                | 35.3              | 32.6                | 16.4                    |        |         |
|                                                                                                           | Higher (Bachelor's degree and above) | 11.5                | 36.5              | 34.1                | 18.0                    |        |         |
| Lack of belief in the effectiveness of a healthy diet in                                                  | Primary or secondary school          | 18.0                | 36.1              | 23.0                | 23.0                    | 37.767 | p<0.001 |
|                                                                                                           | Basic vocational                     | 18.7                | 35.6              | 33.5                | 12.2                    |        |         |

|                                                                  |                                      |      |      |      |      |        |         |
|------------------------------------------------------------------|--------------------------------------|------|------|------|------|--------|---------|
| preventing lifestyle diseases                                    | Secondary or post-secondary          | 13.9 | 34.6 | 34.4 | 17.1 |        |         |
|                                                                  | Higher (Bachelor's degree and above) | 9.1  | 31.5 | 36.9 | 22.4 |        |         |
| Lack of knowledge about current recommendations for healthy diet | Primary or secondary school          | 23.0 | 44.3 | 24.6 | 8.2  | 38.740 | p<0.001 |
|                                                                  | Basic vocational                     | 16.9 | 37.8 | 32.4 | 12.9 |        |         |
|                                                                  | Secondary or post-secondary          | 13.3 | 37.5 | 34.5 | 14.7 |        |         |
|                                                                  | Higher (Bachelor's degree and above) | 9.1  | 33.0 | 37.7 | 20.2 |        |         |

**Table S4.** Barriers limiting healthy diet depending on status on the labor market (% , n=2000)

| Barrier                                                       | Status on the labor market           | Definitely limiting | Slightly limiting | Not really limiting | Definitely not limiting | Chi2    | p       |
|---------------------------------------------------------------|--------------------------------------|---------------------|-------------------|---------------------|-------------------------|---------|---------|
| Costs of healthy food                                         | Working (employed or self-employed)  | 40.3                | 37.1              | 19.6                | 3.0                     | 235.082 | p<0.001 |
|                                                               | Student                              | 41.2                | 36.8              | 17.6                | 4.4                     |         |         |
|                                                               | Unemployed                           | 60.2                | 24.1              | 8.4                 | 7.2                     |         |         |
|                                                               | Retired                              | 45.8                | 33.3              | 15.1                | 5.8                     |         |         |
|                                                               | Disability pensioner                 | 55.1                | 26.9              | 12.8                | 5.1                     |         |         |
|                                                               | Head of household                    | 50.0                | 31.1              | 14.9                | 4.1                     |         |         |
| Lack of time and competing priorities (work, family, hobbies) | Working (employed or self-employed)) | 29.7                | 42.3              | 21.9                | 6.1                     | 188.065 | p<0.001 |
|                                                               | Student                              | 30.9                | 42.6              | 19.1                | 7.4                     |         |         |
|                                                               | Unemployed                           | 20.5                | 36.1              | 21.7                | 21.7                    |         |         |
|                                                               | Retired                              | 15.5                | 31.0              | 30.3                | 23.1                    |         |         |
|                                                               | Disability pensioner                 | 10.3                | 24.4              | 30.8                | 34.6                    |         |         |
|                                                               | Head of household                    | 27.0                | 40.5              | 20.3                | 12.2                    |         |         |
| Adapting habits to a healthier diet                           | Working (employed or self-employed)  | 26.1                | 42.5              | 26.2                | 5.2                     | 32.176  | p<0.01  |
|                                                               | Student                              | 19.1                | 38.2              | 29.4                | 13.2                    |         |         |
|                                                               | Unemployed                           | 30.1                | 45.8              | 12.0                | 12.0                    |         |         |
|                                                               | Retired                              | 23.4                | 47.2              | 20.9                | 8.5                     |         |         |
|                                                               | Disability pensioner                 | 21.8                | 46.2              | 23.1                | 9.0                     |         |         |
|                                                               | Head of household                    | 21.6                | 51.4              | 21.6                | 5.4                     |         |         |
| Easy access to high-calorie and fast food products            | Working (employed or self-employed)  | 24.0                | 35.9              | 29.4                | 10.7                    | 47.119  | p<0.001 |
|                                                               | Student                              | 32.4                | 41.2              | 19.1                | 7.4                     |         |         |
|                                                               | Unemployed                           | 25.3                | 34.9              | 25.3                | 14.5                    |         |         |
|                                                               | Retired                              | 19.1                | 31.2              | 31.7                | 18.0                    |         |         |
|                                                               | Disability pensioner                 | 12.8                | 35.9              | 28.2                | 23.1                    |         |         |
|                                                               | Head of household                    | 27.0                | 20.3              | 41.9                | 10.8                    |         |         |

|                                                                                                                    |                                     |      |      |      |      |        |         |
|--------------------------------------------------------------------------------------------------------------------|-------------------------------------|------|------|------|------|--------|---------|
| Lack of support/solutions /proposals from the health care system (primary care doctor, dietitian, physiotherapist) | Working (employed or self-employed) | 19.2 | 36.7 | 31.7 | 12.3 | 31.571 | p<0.01  |
|                                                                                                                    | Student                             | 14.7 | 27.9 | 39.7 | 17.6 |        |         |
|                                                                                                                    | Unemployed                          | 22.9 | 32.5 | 26.5 | 18.1 |        |         |
|                                                                                                                    | Retired                             | 20.2 | 31.5 | 33.9 | 14.4 |        |         |
|                                                                                                                    | Disability pensioner                | 12.8 | 51.3 | 17.9 | 17.9 |        |         |
|                                                                                                                    | Head of household                   | 29.7 | 32.4 | 31.1 | 6.8  |        |         |
| Lack of access or difficulties in access to good quality products from organic farming and breeding                | Working (employed or self-employed) | 18.5 | 38.9 | 33.0 | 9.7  | 42.147 | p<0.001 |
|                                                                                                                    | Student                             | 5.9  | 39.7 | 38.2 | 16.2 |        |         |
|                                                                                                                    | Unemployed                          | 30.1 | 31.3 | 18.1 | 20.5 |        |         |
|                                                                                                                    | Retired                             | 15.5 | 40.7 | 30.8 | 13.0 |        |         |
|                                                                                                                    | Disability pensioner                | 19.2 | 35.9 | 34.6 | 10.3 |        |         |
|                                                                                                                    | Head of household                   | 27.0 | 29.7 | 37.8 | 5.4  |        |         |
| Lack of support from family, friends and colleagues                                                                | Working (employed or self-employed) | 14.8 | 34.2 | 34.8 | 16.2 | 33.522 | p<0.01  |
|                                                                                                                    | Student                             | 17.6 | 27.9 | 41.2 | 13.2 |        |         |
|                                                                                                                    | Unemployed                          | 20.5 | 31.3 | 32.5 | 15.7 |        |         |
|                                                                                                                    | Retired                             | 13.5 | 29.0 | 36.0 | 21.6 |        |         |
|                                                                                                                    | Disability pensioner                | 12.8 | 35.9 | 21.8 | 29.5 |        |         |
|                                                                                                                    | Head of household                   | 18.9 | 36.5 | 40.5 | 4.1  |        |         |
| Lack of belief in the effectiveness of a healthy diet in preventing lifestyle diseases                             | Working (employed or self-employed) | 12.4 | 33.9 | 36.3 | 17.3 | 40.851 | p<0.001 |
|                                                                                                                    | Student                             | 7.4  | 17.6 | 39.7 | 35.3 |        |         |
|                                                                                                                    | Unemployed                          | 16.9 | 39.8 | 19.3 | 24.1 |        |         |
|                                                                                                                    | Retired                             | 12.1 | 31.9 | 35.3 | 20.7 |        |         |
|                                                                                                                    | Disability pensioner                | 12.8 | 42.3 | 29.5 | 15.4 |        |         |
|                                                                                                                    | Head of household                   | 23.0 | 35.1 | 28.4 | 13.5 |        |         |
| Lack of knowledge about current recommendations on healthy diet                                                    | Working (employed or self-employed) | 12.5 | 35.4 | 37.8 | 14.4 | 35.180 | p<0.01  |
|                                                                                                                    | Student                             | 7.4  | 30.9 | 38.2 | 23.5 |        |         |
|                                                                                                                    | Unemployed                          | 20.5 | 37.3 | 21.7 | 20.5 |        |         |
|                                                                                                                    | Retired                             | 10.1 | 36.6 | 33.0 | 20.2 |        |         |
|                                                                                                                    | Disability pensioner                | 12.8 | 39.7 | 25.6 | 21.8 |        |         |
|                                                                                                                    | Head of household                   | 20.3 | 39.2 | 27.0 | 13.5 |        |         |

**Table S5.** Barriers limiting healthy diet depending on the financial situation (% , n=2000)



| Barrier                                                                                                           | Financial situation | Definitely limiting | Slightly limiting | Not really limiting | Definitely not limiting | Chi2    | p       |
|-------------------------------------------------------------------------------------------------------------------|---------------------|---------------------|-------------------|---------------------|-------------------------|---------|---------|
| Costs of healthy food                                                                                             | Bad                 | 68.6                | 21.6              | 7.3                 | 2.4                     | 210.476 | p<0.001 |
|                                                                                                                   | Mean                | 45.5                | 38.3              | 13.3                | 2.9                     |         |         |
|                                                                                                                   | Good                | 26.3                | 35.3              | 31.5                | 7.0                     |         |         |
| Lack of motivation to introduce changes                                                                           | Bad                 | 30.7                | 42.2              | 18.5                | 8.7                     | 33.131  | p<0.001 |
|                                                                                                                   | Mean                | 27.3                | 38.9              | 24.9                | 8.9                     |         |         |
|                                                                                                                   | Good                | 23.5                | 32.0              | 30.4                | 14.1                    |         |         |
| Adapting habits to a healthier diet                                                                               | Bad                 | 34.8                | 40.8              | 15.7                | 8.7                     | 44.471  | p<0.001 |
|                                                                                                                   | Mean                | 25.2                | 45.8              | 24.1                | 4.9                     |         |         |
|                                                                                                                   | Good                | 20.0                | 42.1              | 28.9                | 9.0                     |         |         |
| Easy access to high-calorie and fast food products                                                                | Bad                 | 26.5                | 36.9              | 23.7                | 12.9                    | 21.833  | p<0.01  |
|                                                                                                                   | Mean                | 22.7                | 36.0              | 30.5                | 10.8                    |         |         |
|                                                                                                                   | Good                | 21.6                | 30.1              | 31.5                | 16.9                    |         |         |
| Difficulty avoiding unhealthy food in local community places or during meetings (business, family)                | Bad                 | 30.3                | 36.2              | 23.0                | 10.5                    | 29.450  | p<0.001 |
|                                                                                                                   | Mean                | 20.2                | 42.2              | 28.9                | 8.7                     |         |         |
|                                                                                                                   | Good                | 17.6                | 37.4              | 34.1                | 11.0                    |         |         |
| Lack of support/solutions/proposals from the health care system (primary care doctor, dietitian, physiotherapist) | Bad                 | 26.5                | 34.5              | 26.8                | 12.2                    | 43.458  | p<0.001 |
|                                                                                                                   | Mean                | 20.2                | 38.0              | 31.3                | 10.5                    |         |         |
|                                                                                                                   | Good                | 15.0                | 31.1              | 35.0                | 19.0                    |         |         |
| Lack of access or difficulties in access to good quality products from organic farming and breeding               | Bad                 | 33.4                | 35.9              | 21.3                | 9.4                     | 92.983  | p<0.001 |
|                                                                                                                   | Mean                | 17.4                | 42.4              | 30.4                | 9.8                     |         |         |
|                                                                                                                   | Good                | 12.2                | 32.3              | 41.6                | 13.9                    |         |         |
| Negative family eating patterns                                                                                   | Bad                 | 26.1                | 32.8              | 26.1                | 15.0                    | 27.216  | p<0.001 |
|                                                                                                                   | Mean                | 16.6                | 37.4              | 31.0                | 14.9                    |         |         |
|                                                                                                                   | Good                | 16.5                | 31.7              | 31.0                | 20.9                    |         |         |
| Lack of support from family, friends and colleagues                                                               | Bad                 | 21.6                | 36.6              | 25.8                | 16.0                    | 45.594  | p<0.001 |
|                                                                                                                   | Mean                | 15.1                | 35.1              | 34.2                | 15.6                    |         |         |
|                                                                                                                   | Good                | 11.1                | 26.4              | 40.9                | 21.6                    |         |         |
| Lack of knowledge and skills on what steps should be taken to apply the principles of a healthy lifestyle         | Bad                 | 22.3                | 35.9              | 26.5                | 15.3                    | 56.232  | p<0.001 |
|                                                                                                                   | Mean                | 14.8                | 39.1              | 33.3                | 12.8                    |         |         |
|                                                                                                                   | Good                | 11.5                | 28.7              | 37.2                | 22.6                    |         |         |
| Lack of belief in the effectiveness of a healthy diet in preventing lifestyle diseases                            | Bad                 | 20.2                | 35.2              | 28.9                | 15.7                    | 39.894  | p<0.001 |
|                                                                                                                   | Mean                | 12.0                | 36.1              | 35.1                | 16.9                    |         |         |
|                                                                                                                   | Good                | 10.6                | 27.7              | 37.7                | 24.0                    |         |         |
| Lack of knowledge about current recommendations on healthy diet                                                   | Bad                 | 20.6                | 35.2              | 30.0                | 14.3                    | 49.159  | p<0.001 |
|                                                                                                                   | Mean                | 11.2                | 39.7              | 34.6                | 14.4                    |         |         |
|                                                                                                                   | Good                | 10.6                | 28.7              | 39.0                | 21.7                    |         |         |
| The taste of healthy food                                                                                         | Bad                 | 17.8                | 36.6              | 30.3                | 15.3                    | 25.678  | p<0.001 |
|                                                                                                                   | Mean                | 11.2                | 37.5              | 34.4                | 16.9                    |         |         |
|                                                                                                                   | Good                | 11.5                | 30.1              | 35.5                | 23.0                    |         |         |

**Table S6.** Barriers limiting healthy diet depending on health status (% , n=2000)

| Barrier                                                                                                           | Health status | Definitely limiting | Slightly limiting | Not really limiting | Definitely not limiting | Chi2   | p       |
|-------------------------------------------------------------------------------------------------------------------|---------------|---------------------|-------------------|---------------------|-------------------------|--------|---------|
| Costs of healthy food                                                                                             | Bad           | 62.3                | 22.5              | 13.1                | 2.1                     | 61.702 | p<0.001 |
|                                                                                                                   | Mean          | 45.9                | 37.3              | 13.3                | 3.4                     |        |         |
|                                                                                                                   | Good          | 37.4                | 35.6              | 22.2                | 4.9                     |        |         |
| Lack of motivation to introduce changes                                                                           | Bad           | 34.6                | 38.7              | 17.8                | 8.9                     | 42.882 | p<0.001 |
|                                                                                                                   | Mean          | 30.2                | 38.8              | 24.0                | 7.0                     |        |         |
|                                                                                                                   | Good          | 22.3                | 36.0              | 28.4                | 13.4                    |        |         |
| Lack of time and competing priorities (work, family, hobbies)                                                     | Bad           | 25.7                | 27.2              | 25.7                | 21.5                    | 32.626 | p<0.001 |
|                                                                                                                   | Mean          | 26.4                | 42.4              | 20.8                | 10.3                    |        |         |
|                                                                                                                   | Good          | 24.4                | 38.0              | 26.2                | 11.4                    |        |         |
| Adapting habits to a healthier diet                                                                               | Bad           | 36.1                | 35.6              | 22.0                | 6.3                     | 49.313 | p<0.001 |
|                                                                                                                   | Mean          | 28.8                | 46.2              | 20.2                | 4.7                     |        |         |
|                                                                                                                   | Good          | 19.8                | 43.8              | 28.0                | 8.3                     |        |         |
| Easy access to high-calorie and fast food products                                                                | Bad           | 27.2                | 34.0              | 22.5                | 16.2                    | 30.335 | p<0.001 |
|                                                                                                                   | Mean          | 24.7                | 37.3              | 29.0                | 9.0                     |        |         |
|                                                                                                                   | Good          | 20.5                | 32.1              | 31.9                | 15.4                    |        |         |
| Difficulty avoiding unhealthy food in local community places or during meetings (business, family)                | Bad           | 29.3                | 32.5              | 23.6                | 14.7                    | 43.153 | p<0.001 |
|                                                                                                                   | Mean          | 22.4                | 44.2              | 26.8                | 6.5                     |        |         |
|                                                                                                                   | Good          | 18.0                | 37.8              | 33.0                | 11.2                    |        |         |
| Lack of support/solutions/proposals from the health care system (primary care doctor, dietitian, physiotherapist) | Bad           | 31.4                | 33.0              | 22.5                | 13.1                    | 72.614 | p<0.001 |
|                                                                                                                   | Mean          | 22.5                | 40.2              | 28.1                | 9.1                     |        |         |
|                                                                                                                   | Good          | 14.8                | 32.0              | 36.5                | 16.7                    |        |         |
|                                                                                                                   | Mean          |                     |                   |                     |                         |        |         |
|                                                                                                                   | Good          |                     |                   |                     |                         |        |         |
| Negative family eating patterns                                                                                   | Bad           | 23.6                | 32.5              | 26.2                | 17.8                    | 47.642 | p<0.001 |
|                                                                                                                   | Mean          | 20.0                | 40.1              | 28.5                | 11.4                    |        |         |
|                                                                                                                   | Good          | 15.1                | 31.4              | 32.6                | 20.8                    |        |         |
| Lack of support from family, friends and colleagues                                                               | Bad           | 23.0                | 30.9              | 26.2                | 19.9                    | 54.210 | p<0.001 |
|                                                                                                                   | Mean          | 17.7                | 37.1              | 31.5                | 13.7                    |        |         |
|                                                                                                                   | Good          | 11.0                | 29.7              | 39.4                | 19.9                    |        |         |
| Lack of knowledge and skills on what steps should be taken to apply the principles of a healthy lifestyle         | Bad           | 20.4                | 40.3              | 23.6                | 15.7                    | 59.736 | p<0.001 |
|                                                                                                                   | Mean          | 16.6                | 41.1              | 31.2                | 11.2                    |        |         |
|                                                                                                                   | Good          | 12.4                | 30.2              | 37.3                | 20.1                    |        |         |
| Lack of belief in the effectiveness of a healthy diet in preventing lifestyle diseases                            | Bad           | 23.0                | 34.6              | 27.7                | 14.7                    | 89.280 | p<0.001 |
|                                                                                                                   | Mean          | 14.3                | 40.6              | 31.9                | 13.2                    |        |         |
|                                                                                                                   | Good          | 9.5                 | 27.4              | 38.9                | 24.2                    |        |         |
| Lack of knowledge about current recommendations on healthy eating                                                 | Bad           | 24.1                | 32.5              | 28.3                | 15.2                    | 78.708 | p<0.001 |
|                                                                                                                   | Mean          | 14.8                | 41.2              | 31.8                | 12.2                    |        |         |
|                                                                                                                   | Good          | 8.1                 | 32.1              | 39.4                | 20.3                    |        |         |
| The taste of healthy food                                                                                         | Bad           | 24.1                | 33.0              | 26.7                | 16.2                    | 64.416 | p<0.001 |
|                                                                                                                   | Mean          | 13.9                | 39.5              | 32.0                | 14.5                    |        |         |
|                                                                                                                   | Good          | 8.4                 | 32.1              | 37.4                | 22.1                    |        |         |

**Table S7.** Barriers limiting healthy diet depending on the type of work performed (%. n=2000)

| Barrier                                                                                                   | Type of work performed | Definitely limiting | Slightly limiting | Not really limiting | Definitely not limiting | Chi2   | p       |
|-----------------------------------------------------------------------------------------------------------|------------------------|---------------------|-------------------|---------------------|-------------------------|--------|---------|
| Lack of motivation to introduce changes                                                                   | Physical               | 33.0                | 36.2              | 22.1                | 8.7                     | 19.636 | p<0.01  |
|                                                                                                           | Mental                 | 23.4                | 37.3              | 27.6                | 11.7                    |        |         |
|                                                                                                           | Mixed                  | 25.7                | 38.8              | 25.7                | 9.8                     |        |         |
| Lack of time and competing priorities (work, family, hobbies)                                             | Physical               | 29.5                | 37.0              | 23.7                | 9.8                     | 17.938 | p<0.01  |
|                                                                                                           | Mental                 | 24.8                | 41.4              | 22.4                | 11.4                    |        |         |
|                                                                                                           | Mixed                  | 22.1                | 36.4              | 26.6                | 14.9                    |        |         |
| Lack of knowledge and skills on what steps should be taken to apply the principles of a healthy lifestyle | Physical               | 21.0                | 36.6              | 29.2                | 13.2                    | 31.196 | p<0.001 |
|                                                                                                           | Mental                 | 11.6                | 34.7              | 35.4                | 18.3                    |        |         |
|                                                                                                           | Mixed                  | 14.1                | 36.2              | 34.6                | 15.0                    |        |         |
| Lack of belief in the effectiveness of a healthy diet in preventing lifestyle diseases                    | Physical               | 18.1                | 36.2              | 32.4                | 13.2                    | 37.495 | p<0.001 |
|                                                                                                           | Mental                 | 9.4                 | 32.3              | 36.5                | 21.9                    |        |         |
|                                                                                                           | Mixed                  | 12.9                | 33.0              | 35.0                | 19.2                    |        |         |
| Lack of knowledge about current recommendations on healthy eating                                         | Physical               | 17.2                | 38.6              | 32.1                | 12.1                    | 31.732 | p<0.001 |
|                                                                                                           | Mental                 | 9.7                 | 33.5              | 37.7                | 19.1                    |        |         |
|                                                                                                           | Mixed                  | 12.0                | 37.1              | 34.2                | 16.7                    |        |         |
| The taste of healthy food                                                                                 | Physical               | 16.3                | 37.7              | 32.4                | 13.6                    | 26.125 | p<0.001 |
|                                                                                                           | Mental                 | 11.0                | 32.8              | 34.6                | 21.5                    |        |         |
|                                                                                                           | Mixed                  | 10.0                | 36.8              | 35.1                | 18.1                    |        |         |

**Table S8.** Barriers limiting regular physical activity depending on sex (%. n=2000)

| Barrier                                                                                          | Sex   | Definitely limiting | Slightly limiting | Not really limiting | Definitely not limiting | Chi2   | p       |
|--------------------------------------------------------------------------------------------------|-------|---------------------|-------------------|---------------------|-------------------------|--------|---------|
| Lack of motivation to exercise                                                                   | Women | 31.1                | 35.9              | 22.4                | 10.5                    | 21.443 | p<0.001 |
|                                                                                                  | Men   | 23.0                | 35.9              | 28.6                | 12.5                    |        |         |
| No willingness to exercise                                                                       | Women | 29.7                | 38.2              | 20.9                | 11.2                    | 26.473 | p<0.001 |
|                                                                                                  | Men   | 21.7                | 36.2              | 28.0                | 14.1                    |        |         |
| Feeling constant fatigue and lack of energy                                                      | Women | 28.7                | 40.5              | 21.9                | 9.0                     | 30.082 | p<0.001 |
|                                                                                                  | Men   | 19.7                | 40.1              | 30.1                | 10.1                    |        |         |
| Lack of support from the health care system (primary care doctor, dietitian, physiotherapist)    | Women | 19.9                | 34.5              | 31.4                | 14.2                    | 19.210 | p<0.001 |
|                                                                                                  | Men   | 13.0                | 34.6              | 34.9                | 17.4                    |        |         |
| Lack of skills (I'm not physically fit enough)                                                   | Women | 20.3                | 34.3              | 30.1                | 15.3                    | 37.179 | p<0.001 |
|                                                                                                  | Men   | 11.4                | 32.3              | 36.3                | 19.9                    |        |         |
| Lack of support from family, friends, acquaintances (I have no one to exercise with)             | Women | 16.7                | 35.1              | 30.0                | 18.2                    | 19.538 | p<0.001 |
|                                                                                                  | Men   | 10.5                | 33.9              | 34.2                | 21.4                    |        |         |
| Lack of belief in the effectiveness of physical activity in the prevention of lifestyle diseases | Women | 14.4                | 31.4              | 32.9                | 21.3                    | 11.712 | p<0.01  |
|                                                                                                  | Men   | 10.1                | 29.6              | 37.4                | 23.0                    |        |         |
| Barriers in the built environment and                                                            | Women | 15.2%               | 30.6%             | 31.4%               | 22.8%                   | 20.235 | p<0.001 |
|                                                                                                  | Men   | 8.9%                | 30.2%             | 36.3%               | 24.6%                   |        |         |

|                                                                                                |       |       |       |       |       |        |        |
|------------------------------------------------------------------------------------------------|-------|-------|-------|-------|-------|--------|--------|
| geographical isolation (I have nowhere to exercise, no access to fitness clubs, swimming pool) |       |       |       |       |       |        |        |
| Atmospheric conditions                                                                         | Women | 10.9% | 33.8% | 35.1% | 20.2% | 12.439 | p<0.01 |
|                                                                                                | Men   | 7.2%  | 31.0% | 38.3% | 23.5% |        |        |

**Table S9.** Barriers limiting regular physical activity depending on the place of residence (% , n=2000)

| Barrier                                                                                                                              | Place of residence              | Definitely limiting | Slightly limiting | Not really limiting | Definitely not limiting | Chi2   | p       |
|--------------------------------------------------------------------------------------------------------------------------------------|---------------------------------|---------------------|-------------------|---------------------|-------------------------|--------|---------|
| Lack of belief in the effectiveness of physical activity in the prevention of lifestyle diseases                                     | Village                         | 16.1                | 28.7              | 35.6                | 19.6                    | 23.169 | p<0.01  |
|                                                                                                                                      | City < 200.000 citizens         | 8.6                 | 31.8              | 36.3                | 23.3                    |        |         |
|                                                                                                                                      | City 200 000 - 500 000 citizens | 10.4                | 31.5              | 34.4                | 23.7                    |        |         |
|                                                                                                                                      | City < 500 tys. citizens        | 11.9                | 31.9              | 31.6                | 24.5                    |        |         |
| Barriers in the built environment and geographical isolation (I have nowhere to exercise, no access to fitness clubs, swimming pool) | Village                         | 16.8                | 33.2              | 30.9                | 19.1                    | 51.315 | p<0.001 |
|                                                                                                                                      | City < 200.000 citizens         | 7.6                 | 30.7              | 36.7                | 25.0                    |        |         |
|                                                                                                                                      | City 200 000 - 500 000 citizens | 10.1                | 26.3              | 38.3                | 25.3                    |        |         |
|                                                                                                                                      | City < 500 tys. citizens        | 11.3                | 26.8              | 31.0                | 31.0                    |        |         |

**Table S10.** Barriers limiting regular physical activity depending on the status on the labor market (% , n=2000)

| Barrier                                                                   | Status on the labor market          | Definitely limiting | Slightly limiting | Not really limiting | Definitely not limiting | Chi2    | p       |
|---------------------------------------------------------------------------|-------------------------------------|---------------------|-------------------|---------------------|-------------------------|---------|---------|
| Lack of time and competing priorities (work, family, hobbies)             | Working (employed or self-employed) | 34.2                | 36.3              | 21.5                | 8.1                     | 153.068 | p<0.001 |
|                                                                           | Student                             | 33.8                | 39.7              | 14.7                | 11.8                    |         |         |
|                                                                           | Unemployed                          | 22.9                | 37.3              | 21.7                | 18.1                    |         |         |
|                                                                           | Retired                             | 17.5                | 30.8              | 29.0                | 22.7                    |         |         |
|                                                                           | Disability pensioner                | 10.3                | 35.9              | 17.9                | 35.9                    |         |         |
|                                                                           | Head of household                   | 31.1                | 44.6              | 18.9                | 5.4                     |         |         |
| Competition with activities promoting a sedentary lifestyle (watching TV) | Working (employed or self-employed) | 17.3                | 40.2              | 30.4                | 12.2                    | 39.904  | p<0.001 |
|                                                                           | Student                             | 14.7                | 45.6              | 23.5                | 16.2                    |         |         |
|                                                                           | Unemployed                          | 18.1                | 42.2              | 24.1                | 15.7                    |         |         |
|                                                                           | Retired                             | 15.5                | 31.2              | 35.3                | 18.0                    |         |         |
|                                                                           | Disability pensioner                | 12.8                | 44.9              | 16.7                | 25.6                    |         |         |
|                                                                           | Head of household                   | 18.9                | 45.9              | 27.0                | 8.1                     |         |         |
| Lack of skills (I'm not physically fit enough)                            | Working (employed or self-employed) | 14.9                | 33.1              | 35.1                | 16.8                    | 52.268  | p<0.001 |
|                                                                           | Student                             | 11.8                | 23.5              | 30.9                | 33.8                    |         |         |
|                                                                           | Unemployed                          | 25.3                | 39.8              | 14.5                | 20.5                    |         |         |

|                                                                                                                                      |                                     |      |      |      |      |        |         |
|--------------------------------------------------------------------------------------------------------------------------------------|-------------------------------------|------|------|------|------|--------|---------|
|                                                                                                                                      | Retired                             | 15.5 | 32.1 | 33.3 | 19.1 |        |         |
|                                                                                                                                      | Disability pensioner                | 26.9 | 42.3 | 17.9 | 12.8 |        |         |
|                                                                                                                                      | Head of household                   | 21.6 | 36.5 | 35.1 | 6.8  |        |         |
| Concern due to physical condition (e.g. disability, chronic disease)                                                                 | Working (employed or self-employed) | 12.1 | 29.6 | 32.8 | 25.5 | 95.128 | p<0.001 |
|                                                                                                                                      | Student                             | 8.8  | 16.2 | 29.4 | 45.6 |        |         |
|                                                                                                                                      | Unemployed                          | 16.9 | 39.8 | 20.5 | 22.9 |        |         |
|                                                                                                                                      | Retired                             | 15.1 | 28.8 | 31.9 | 24.3 |        |         |
|                                                                                                                                      | Disability pensioner                | 42.3 | 34.6 | 9.0  | 14.1 |        |         |
|                                                                                                                                      | Head of household                   | 24.3 | 24.3 | 31.1 | 20.3 |        |         |
| Lack of support from family, friends, acquaintances (I have no one to exercise with)                                                 | Working (employed or self-employed) | 13.2 | 35.9 | 31.8 | 19.1 | 31.175 | p<0.01  |
|                                                                                                                                      | Student                             | 5.9  | 29.4 | 42.6 | 22.1 |        |         |
|                                                                                                                                      | Unemployed                          | 19.3 | 33.7 | 28.9 | 18.1 |        |         |
|                                                                                                                                      | Retired                             | 14.2 | 28.8 | 34.8 | 22.2 |        |         |
|                                                                                                                                      | Disability pensioner                | 14.1 | 42.3 | 19.2 | 24.4 |        |         |
|                                                                                                                                      | Head of household                   | 21.6 | 41.9 | 25.7 | 10.8 |        |         |
| Barriers in the built environment and geographical isolation (I have nowhere to exercise, no access to fitness clubs, swimming pool) | Working (employed or self-employed) | 10.9 | 31.8 | 35.4 | 21.9 | 47.953 | p<0.001 |
|                                                                                                                                      | Student                             | 11.8 | 32.4 | 23.5 | 32.4 |        |         |
|                                                                                                                                      | Unemployed                          | 19.3 | 32.5 | 24.1 | 24.1 |        |         |
|                                                                                                                                      | Retired                             | 11.0 | 25.8 | 35.5 | 27.6 |        |         |
|                                                                                                                                      | Disability pensioner                | 16.7 | 28.2 | 24.4 | 30.8 |        |         |
|                                                                                                                                      | Head of household                   | 28.4 | 32.4 | 25.7 | 13.5 |        |         |
| Sufficient level of physical activity in the opinion of respondents                                                                  | Working (employed or self-employed) | 12.4 | 33.1 | 39.5 | 15.1 | 31.311 | p<0.01  |
|                                                                                                                                      | Student                             | 11.8 | 30.9 | 30.9 | 26.5 |        |         |
|                                                                                                                                      | Unemployed                          | 19.3 | 41.0 | 25.3 | 14.5 |        |         |
|                                                                                                                                      | Retired                             | 7.6  | 32.8 | 40.7 | 18.9 |        |         |
|                                                                                                                                      | Disability pensioner                | 12.8 | 33.3 | 37.2 | 16.7 |        |         |
|                                                                                                                                      | Head of household                   | 18.9 | 36.5 | 35.1 | 9.5  |        |         |
| Fear of injury                                                                                                                       | Working (employed or self-employed) | 9.9  | 28.1 | 36.3 | 25.7 | 45.362 | p<0.001 |
|                                                                                                                                      | Student                             | 5.9  | 19.1 | 29.4 | 45.6 |        |         |
|                                                                                                                                      | Unemployed                          | 15.7 | 37.3 | 20.5 | 26.5 |        |         |
|                                                                                                                                      | Retired                             | 13.0 | 27.9 | 33.5 | 25.6 |        |         |
|                                                                                                                                      | Disability pensioner                | 15.4 | 44.9 | 19.2 | 20.5 |        |         |
|                                                                                                                                      | Head of household                   | 14.9 | 29.7 | 37.8 | 17.6 |        |         |

**Table S11.** Barriers limiting regular physical activity depending on the financial situation (% , n=2000)

| Barrier                                                                                                                              | Financial situation | Definitely limiting | Slightly limiting | Not really limiting | Definitely not limiting | Chi2    | p       |
|--------------------------------------------------------------------------------------------------------------------------------------|---------------------|---------------------|-------------------|---------------------|-------------------------|---------|---------|
| Lack of motivation to exercise                                                                                                       | Bad                 | 35.2                | 36.6              | 17.8                | 10.5                    | 45.213  | p<0.001 |
|                                                                                                                                      | Mean                | 27.9                | 38.1              | 24.3                | 9.7                     |         |         |
|                                                                                                                                      | Good                | 21.9                | 31.1              | 31.5                | 15.5                    |         |         |
| No willingness to exercise                                                                                                           | Bad                 | 33.8                | 37.3              | 16.4                | 12.5                    | 34.565  | p<0.001 |
|                                                                                                                                      | Mean                | 25.7                | 39.2              | 24.5                | 10.5                    |         |         |
|                                                                                                                                      | Good                | 22.3                | 33.4              | 27.8                | 16.5                    |         |         |
| Feeling constant fatigue and lack of energy                                                                                          | Bad                 | 39.0                | 38.0              | 13.2                | 9.8                     | 88.811  | p<0.001 |
|                                                                                                                                      | Mean                | 24.1                | 43.3              | 25.4                | 7.2                     |         |         |
|                                                                                                                                      | Good                | 17.7                | 35.5              | 32.9                | 13.9                    |         |         |
| Competition with activities promoting a sedentary lifestyle (watching TV)                                                            | Bad                 | 24.4                | 37.3              | 25.4                | 12.9                    | 27.104  | p<0.001 |
|                                                                                                                                      | Mean                | 16.3                | 40.8              | 30.2                | 12.7                    |         |         |
|                                                                                                                                      | Good                | 13.6                | 35.8              | 32.9                | 17.7                    |         |         |
| Lack of support from the health care system (primary care doctor, dietitian, physiotherapist)                                        | Bad                 | 28.2                | 31.4              | 27.5                | 12.9                    | 82.593  | p<0.001 |
|                                                                                                                                      | Mean                | 16.7                | 38.2              | 32.5                | 12.6                    |         |         |
|                                                                                                                                      | Good                | 10.6                | 28.9              | 37.0                | 23.5                    |         |         |
| Lack of skills (I'm not physically fit enough)                                                                                       | Bad                 | 27.2                | 36.6              | 20.9                | 15.3                    | 71.336  | p<0.001 |
|                                                                                                                                      | Mean                | 15.2                | 36.3              | 32.9                | 15.6                    |         |         |
|                                                                                                                                      | Good                | 12.3                | 25.9              | 39.5                | 22.3                    |         |         |
| Concern due to physical condition (e.g. disability, chronic disease)                                                                 | Bad                 | 28.6                | 34.8              | 20.6                | 16.0                    | 100.671 | p<0.001 |
|                                                                                                                                      | Mean                | 13.4                | 31.7              | 30.4                | 24.5                    |         |         |
|                                                                                                                                      | Good                | 9.6                 | 22.1              | 37.4                | 31.0                    |         |         |
| Lack of support from family, friends, acquaintances (I have no one to exercise with)                                                 | Bad                 | 22.3                | 34.5              | 25.4                | 17.8                    | 46.760  | p<0.001 |
|                                                                                                                                      | Mean                | 14.0                | 36.6              | 32.0                | 17.5                    |         |         |
|                                                                                                                                      | Good                | 9.0                 | 30.4              | 35.3                | 25.2                    |         |         |
| Lack of belief in the effectiveness of physical activity in the prevention of lifestyle diseases                                     | Bad                 | 19.9                | 30.3              | 31.4                | 18.5                    | 39.255  | p<0.001 |
|                                                                                                                                      | Mean                | 12.1                | 33.3              | 34.0                | 20.6                    |         |         |
|                                                                                                                                      | Good                | 9.0                 | 25.2              | 38.8                | 27.0                    |         |         |
| Barriers in the built environment and geographical isolation (I have nowhere to exercise, no access to fitness clubs, swimming pool) | Bad                 | 22.0                | 30.3              | 27.5                | 20.2                    | 45.143  | p<0.001 |
|                                                                                                                                      | Mean                | 10.9                | 32.7              | 34.4                | 22.0                    |         |         |
|                                                                                                                                      | Good                | 9.9                 | 25.9              | 35.5                | 28.7                    |         |         |
| Sufficient level of physical activity in the opinion of respondents                                                                  | Bad                 | 20.6                | 33.1              | 30.3                | 16.0                    | 36.339  | p<0.001 |
|                                                                                                                                      | Mean                | 10.5                | 35.0              | 40.1                | 14.4                    |         |         |
|                                                                                                                                      | Good                | 10.1                | 30.4              | 39.8                | 19.7                    |         |         |
| Lack of knowledge about current recommendations regarding physical activity                                                          | Bad                 | 18.1                | 35.5              | 28.9                | 17.4                    | 40.449  | p<0.001 |
|                                                                                                                                      | Mean                | 11.2                | 37.0              | 37.0                | 14.9                    |         |         |
|                                                                                                                                      | Good                | 9.2                 | 28.7              | 39.5                | 22.6                    |         |         |
| Fear of injury                                                                                                                       | Bad                 | 17.4                | 35.9              | 27.2                | 19.5                    | 49.137  | p<0.001 |
|                                                                                                                                      | Mean                | 10.5                | 30.5              | 34.9                | 24.1                    |         |         |
|                                                                                                                                      | Good                | 9.0                 | 22.1              | 36.2                | 32.7                    |         |         |
| Social norms and stigma "I don't feel welcome" (e.g. in a fitness club)                                                              | Bad                 | 17.1                | 28.2              | 32.4                | 22.3                    | 30.707  | p<0.001 |
|                                                                                                                                      | Mean                | 10.2                | 30.4              | 37.3                | 22.1                    |         |         |
|                                                                                                                                      | Good                | 9.6                 | 23.7              | 36.3                | 30.4                    |         |         |
| Atmospheric conditions                                                                                                               | Bad                 | 13.9                | 37.3              | 29.6                | 19.2                    | 31.466  | p<0.001 |
|                                                                                                                                      | Mean                | 8.4                 | 34.5              | 36.6                | 20.4                    |         |         |
|                                                                                                                                      | Good                | 8.2                 | 25.9              | 40.2                | 25.7                    |         |         |

**Table S12.** Barriers limiting regular physical activity depending on health status (% , n=2000)

| Barrier                                                                                                                              | Health status | Definitely limiting | Slightly limiting | Not really limiting | Definitely not limiting | Chi2    | p       |
|--------------------------------------------------------------------------------------------------------------------------------------|---------------|---------------------|-------------------|---------------------|-------------------------|---------|---------|
| Lack of time and competing priorities (work, family, hobbies)                                                                        | Bad           | 29.5                | 39.2              | 22.2                | 9.2                     | 34.191  | p<0.001 |
|                                                                                                                                      | Mean          | 27.2                | 30.4              | 18.8                | 23.6                    |         |         |
|                                                                                                                                      | Good          | 28.9                | 33.4              | 23.9                | 13.8                    |         |         |
| Lack of motivation to exercise                                                                                                       | Bad           | 39.8                | 30.4              | 19.9                | 9.9                     | 59.268  | p<0.001 |
|                                                                                                                                      | Mean          | 30.5                | 39.2              | 22.7                | 7.6                     |         |         |
|                                                                                                                                      | Good          | 22.1                | 34.2              | 28.8                | 14.9                    |         |         |
| No willingness to exercise                                                                                                           | Bad           | 36.6                | 33.5              | 16.8                | 13.1                    | 54.062  | p<0.001 |
|                                                                                                                                      | Mean          | 29.6                | 39.5              | 22.4                | 8.5                     |         |         |
|                                                                                                                                      | Good          | 20.7                | 36.1              | 27.3                | 15.9                    |         |         |
| Feeling constant fatigue and lack of energy                                                                                          | Bad           | 50.3                | 30.4              | 15.7                | 3.7                     | 165.541 | p<0.001 |
|                                                                                                                                      | Mean          | 28.6                | 44.5              | 21.6                | 5.3                     |         |         |
|                                                                                                                                      | Good          | 15.9                | 38.7              | 31.3                | 14.1                    |         |         |
| Competition with activities promoting a sedentary lifestyle (watching TV)                                                            | Bad           | 21.5                | 34.0              | 23.6                | 20.9                    | 57.096  | p<0.001 |
|                                                                                                                                      | Mean          | 19.5                | 43.3              | 28.5                | 8.7                     |         |         |
|                                                                                                                                      | Good          | 13.4                | 36.1              | 33.1                | 17.4                    |         |         |
| Lack of support from the health care system (primary care doctor, dietitian, physiotherapist)                                        | Bad           | 30.4                | 30.9              | 29.8                | 8.9                     | 114.325 | p<0.001 |
|                                                                                                                                      | Mean          | 18.3                | 42.3              | 29.6                | 9.8                     |         |         |
|                                                                                                                                      | Good          | 12.5                | 28.8              | 36.7                | 22.1                    |         |         |
| Lack of skills (I'm not physically fit enough)                                                                                       | Bad           | 41.4                | 34.0              | 18.3                | 6.3                     | 182.280 | p<0.001 |
|                                                                                                                                      | Mean          | 18.1                | 38.2              | 31.3                | 12.5                    |         |         |
|                                                                                                                                      | Good          | 9.6                 | 29.2              | 37.4                | 23.9                    |         |         |
| Concern due to physical condition (e.g. disability, chronic disease)                                                                 | Bad           | 47.6                | 31.9              | 16.2                | 4.2                     | 383.451 | p<0.001 |
|                                                                                                                                      | Mean          | 16.1                | 37.8              | 31.8                | 14.3                    |         |         |
|                                                                                                                                      | Good          | 6.6                 | 21.8              | 33.2                | 38.3                    |         |         |
| Lack of support from family, friends, acquaintances (I have no one to exercise with)                                                 | Bad           | 23.0                | 36.1              | 25.1                | 15.7                    | 77.078  | p<0.001 |
|                                                                                                                                      | Mean          | 16.5                | 39.6              | 29.6                | 14.3                    |         |         |
|                                                                                                                                      | Good          | 9.7                 | 29.9              | 35.4                | 25.1                    |         |         |
| Lack of belief in the effectiveness of physical activity in the prevention of lifestyle diseases                                     | Bad           | 25.7                | 31.9              | 26.7                | 15.7                    | 99.462  | p<0.001 |
|                                                                                                                                      | Mean          | 14.9                | 35.6              | 32.5                | 17.0                    |         |         |
|                                                                                                                                      | Good          | 7.6                 | 26.0              | 38.7                | 27.6                    |         |         |
| Barriers in the built environment and geographical isolation (I have nowhere to exercise, no access to fitness clubs, swimming pool) | Bad           | 19.4                | 31.9              | 25.1                | 23.6                    | 52.395  | p<0.001 |
|                                                                                                                                      | Mean          | 14.9                | 33.8              | 32.5                | 18.8                    |         |         |
|                                                                                                                                      | Good          | 8.5                 | 27.2              | 36.5                | 27.7                    |         |         |
| Sufficient level of physical activity in the opinion of respondents                                                                  | Bad           | 24.6                | 27.2              | 28.8                | 19.4                    | 65.149  | p<0.001 |
|                                                                                                                                      | Mean          | 13.0                | 37.3              | 37.6                | 12.1                    |         |         |
|                                                                                                                                      | Good          | 8.4                 | 31.3              | 41.4                | 18.9                    |         |         |
| Lack of knowledge about current recommendations regarding physical activity                                                          | Bad           | 23.0                | 29.3              | 33.0                | 14.7                    | 105.322 | p<0.001 |
|                                                                                                                                      | Mean          | 14.4                | 41.5              | 32.1                | 12.0                    |         |         |
|                                                                                                                                      | Good          | 7.0                 | 29.5              | 41.0                | 22.6                    |         |         |
| Fear of injury                                                                                                                       | Bad           | 26.7                | 33.5              | 25.1                | 14.7                    | 146.661 | p<0.001 |
|                                                                                                                                      | Mean          | 12.0                | 35.2              | 35.0                | 17.8                    |         |         |
|                                                                                                                                      | Good          | 7.3                 | 22.7              | 35.2                | 34.9                    |         |         |
| Social norms and stigma "I don't feel welcome" (e.g. in a fitness club)                                                              | Bad           | 16.8                | 24.6              | 33.0                | 25.7                    | 63.115  | p<0.001 |
|                                                                                                                                      | Mean          | 13.9                | 32.1              | 36.6                | 17.3                    |         |         |
|                                                                                                                                      | Good          | 7.4                 | 25.5              | 36.8                | 30.3                    |         |         |
| Atmospheric conditions                                                                                                               | Bad           | 15.2                | 33.0              | 34.0                | 17.8                    | 57.874  | p<0.001 |
|                                                                                                                                      | Mean          | 10.4                | 38.3              | 34.9                | 16.4                    |         |         |

|  |      |     |      |      |      |  |  |
|--|------|-----|------|------|------|--|--|
|  | Good | 6.9 | 27.4 | 38.6 | 27.0 |  |  |
|--|------|-----|------|------|------|--|--|

Table S13 Barriers limiting regular physical activity depending on the type of work performed (%  
n=2000)

| Barrier                                                                                          | Type of work | Definitely limiting | Slightly limiting | Not really limiting | Definitely not limiting | Chi2   | p      |
|--------------------------------------------------------------------------------------------------|--------------|---------------------|-------------------|---------------------|-------------------------|--------|--------|
| Lack of belief in the effectiveness of physical activity in the prevention of lifestyle diseases | Physical     | 17.2                | 31.9              | 32.6                | 18.3                    | 22.005 | p<0.01 |
|                                                                                                  | Mental       | 10.3                | 29.6              | 35.9                | 24.2                    |        |        |
|                                                                                                  | Mixed        | 10.9                | 30.8              | 35.9                | 22.5                    |        |        |
